# Supplementary material for: Whole genome phylogenies for multiple Drosophila species
Source: PubMed Central journal article supplement (PMC3531268; doi:10.1186/1756-0500-5-670), 2012-12-04

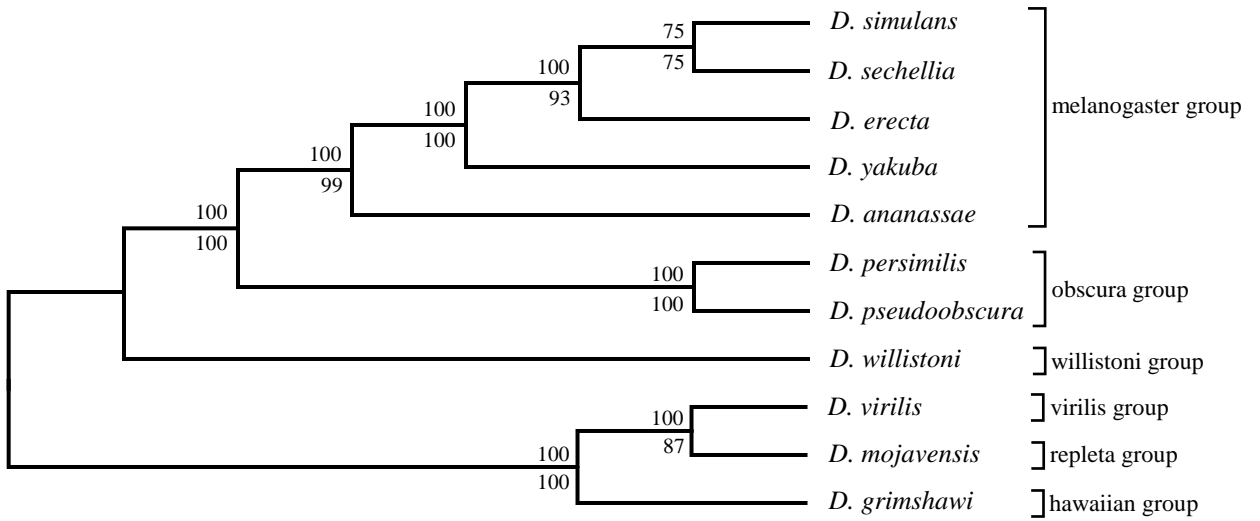

Supplement: 1756-0500-5-670-S8.pdf [file 1756-0500-5-670-S8.pdf]
